# Supplementary material for: Signalling mechanisms underlying doxorubicin and Nox2 NADPH oxidase‐induced cardiomyopathy: involvement of mitofusin‐2
Source: PubMed Central journal article supplement (PMC5647180; doi:10.1111/bph.13773), 2017-04-22
Supplement: BPH-174-3677-s001.pdf [file BPH-174-3677-s001.pdf]

## **SUPPORTING INFORMATION**

### **SIGNALLING MECHANISMS UNDERLYING DOXORUBICIN AND NOX2 NADPH OXIDASE-INDUCED CARDIOMYOPATHY: INVOLVEMENT OF MITOFUSIN-2**

Declan McLaughlin<sup>1</sup>, Youyou Zhao<sup>1</sup>, Karla M. O'Neill<sup>1</sup>, Kevin S. Edgar<sup>1</sup>, Philip D. Dunne<sup>2</sup>,  
Anna M. Kearney<sup>1</sup>, David J. Grieve<sup>1</sup>, Barbara J. McDermott<sup>1</sup>

Queen's University Belfast, <sup>1</sup>Wellcome-Wolfson Institute for Experimental Medicine, and

<sup>2</sup>Centre for Cancer Research & Cell Biology, Belfast BT9 7AE, UK

**TABLE S1: Real-time RT-PCR primer sequences**

| <b>Gene</b>                                                                          | <b>Forward Sequence</b>               | <b>Reverse Sequence</b>                 |
|--------------------------------------------------------------------------------------|---------------------------------------|-----------------------------------------|
| <b>β-actin</b>                                                                       | 5' CGT GAA AAG ATG ACC CAG ATC A 3'   | 5' TGG TAC GAC CAG AGG CAT ACA G 3'     |
| <b>Nox2</b>                                                                          | 5' ACT CCT TGG GTC AGC ACT GG 3'      | 5' GTT CCT GTC CAG TTG TCT TCG 3'       |
| <b>GPx1</b>                                                                          | 5' AGG CTC ACC CGC TCT TTA CC 3'      | 5' GGG TCG TCA CTG GGT GTT G 3'         |
| <b>NOS1 (nNOS)</b>                                                                   | 5' GAC TGA TGG CAA GCA TGA CTT C 3'   | 5' GCC CAA GGT AGA GCC ATC TG 3'        |
| <b>NOS2 (iNOS)</b>                                                                   | 5' TGA CGG CAA ACA TGA CTT CAG 3'     | 5' GCC ATC GGG CAT CTG GTA 3'           |
| <b>NOS3 (eNOS)</b>                                                                   | 5' TCT GCG GCG ATG TCA CTA TG 3'      | 5' CCA TGC CGC CCT CTG TT 3'            |
| <b>SOD1</b>                                                                          | 5' AGC ATT CCA TCA TTG GCC GTA 3'     | 5' TTT CCA CCT TTG CCC AAG TCA 3'       |
| <b>SOD2</b>                                                                          | 5' ACA GAT TGC TGC CTG CTC TAA TCA 3' | 5' TAA GCG TGC TCC CAC ACG TC 3'        |
| <b>Glutaredoxin1</b>                                                                 | 5' CCC TTC CCA CTC CTG CAT T 3'       | 5' GGA GGT TGA GGC TGA GAA CAC T 3'     |
| <b>Glutaredoxin2</b>                                                                 | 5' TTT GTC AAT GGA CGA TTT ATT GGA 3' | 5'GCA GCA ATT TCC CTT CTT TGT G 3'      |
| <b>Catalase</b>                                                                      | 5' TTC AGA AGA AAG CGG TCA AGA AT 3'  | 5' GAT GCG GGC CCC ATA GTC 3'           |
| <b>Peroxisome proliferator-activated receptor gamma coactivator 1-alpha (PGC-1α)</b> | 5' CAG CCC AGA GTC ACC AAA TGA 3'     | 5' TTC CAG AGA GTT CCA CAC TTA AGG T 3' |
| <b>Mitofusin 2 (Mfn2)</b>                                                            | 5' CAG TTG GTG TCT GGC ATT GTG 3'     | 5' AGG GCC TCA GTG GCA AGA A 3'         |

Real-time RT-PCR primer sequences were generated using Primer Express Software (Applied Biosystems, UK) and primers obtained from Invitrogen (UK).

**TABLE S2: Differentially expressed genes in LV tissue from WT vs. Nox<sup>-/-</sup> mice****(A) Upregulated genes**

| DEFINITION                                                                         | Gene ID       | logFC | Ave Expr | p value  | Adj. p value |
|------------------------------------------------------------------------------------|---------------|-------|----------|----------|--------------|
| integrin beta 1 binding protein 3 (Itgb1bp3)                                       | ITGB1BP3      | 1.169 | 7.96     | 7.31E-04 | 0.093        |
| hemoglobin, beta adult major chain (Hbb-b1)                                        | HBB-B1        | 0.973 | 9.32     | 1.77E-04 | 0.049        |
| actin, alpha 2, smoothcle, aorta (Acta2)                                           | ACTA2         | 0.783 | 9.56     | 3.57E-08 | 0.001        |
| pleckstrin homology-like domain, family A, member 1 (Phlda1)                       | PHLDA1        | 0.695 | 9.26     | 3.36E-05 | 0.028        |
| DEAD (Asp-Glu-Ala-Asp) box polypeptide 24 (Ddx24)                                  | DDX24         | 0.627 | 8.57     | 8.66E-06 | 0.016        |
| heterogeneous nuclear ribonucleoprotein A2/B1 (Hnmpa2b1), transcript variant 2     | HNRNPA2B1     | 0.615 | 9.54     | 4.05E-05 | 0.028        |
| RIKEN cDNA 1810015C04 gene (1810015C04Rik), transcript variant 2                   | 1810015C04RIK | 0.588 | 11.31    | 2.73E-04 | 0.063        |
| PREDICTED: similar to mitofusin 2, transcript variant 1 (LOC100044767)             | MFN2          | 0.573 | 8.06     | 1.73E-04 | 0.048        |
| phosphofructokinase,cle (Pfkcm)                                                    | PFKM          | 0.562 | 8.82     | 3.26E-04 | 0.068        |
| tubulin, alpha 8 (Tuba8)                                                           | TUBA8         | 0.548 | 9.49     | 9.23E-05 | 0.039        |
| SH3-domain kinase binding protein 1 (Sh3kbp1)                                      | SH3KBP1       | 0.543 | 9.96     | 2.37E-06 | 0.010        |
|                                                                                    | HRMT1L2       | 0.518 | 9.31     | 8.79E-04 | 0.096        |
| heat shock protein 1 (chaperonin) (Hspd1)                                          | HSPD1         | 0.516 | 9.87     | 5.78E-06 | 0.012        |
| cyclin D2 (Ccnd2)                                                                  | CCND2         | 0.512 | 9.60     | 1.88E-05 | 0.024        |
| actin, beta, cytoplasmic (Actb)                                                    | ACTB          | 0.509 | 8.58     | 9.59E-04 | 0.099        |
| PREDICTED: similar to human protein homologous to DROER protein (LOC100042777)     | LOC100042777  | 0.503 | 8.89     | 5.49E-05 | 0.034        |
| peroxisome proliferative activated receptor, gamma, coactivator 1 alpha (Ppargc1a) | PPARGC1A      | 0.500 | 8.92     | 3.58E-06 | 0.010        |
| trafficking protein particle complex 3 (Trappc3)                                   | TRAPPC3       | 0.500 | 8.34     | 4.08E-05 | 0.028        |
| Nipped-B homolog (Drosophila) (Nipbl), transcript variant A                        | NIPBL         | 0.489 | 8.58     | 1.73E-05 | 0.024        |
| tubulin, beta 6 (Tubb6)                                                            | TUBB6         | 0.487 | 8.62     | 3.93E-04 | 0.076        |
| transmembrane protein 63b (Tmem63b)                                                | TMEM63B       | 0.473 | 9.59     | 4.19E-05 | 0.028        |
| heat shock protein 1 (Hspb1)                                                       | HSPB1         | 0.471 | 9.84     | 1.97E-05 | 0.024        |
| acidic (leucine-rich) nuclear phosphoprotein 32 family, member E (Anp32e)          | ANP32E        | 0.468 | 9.10     | 1.12E-04 | 0.039        |
| calcium channel, voltage-dependent, alpha2/delta subunit 1 (Cacna2d1)              | CACNA2D1      | 0.467 | 8.77     | 2.92E-05 | 0.028        |
| dystroglycan 1 (Dag1)                                                              | DAG1          | 0.438 | 9.46     | 4.40E-04 | 0.078        |
| peroxisomal biogenesis factor 11a (Pex11a)                                         | PEX11A        | 0.433 | 8.13     | 3.29E-05 | 0.028        |
| enhancer of rudimentary homolog (Drosophila) (Erh)                                 | ERH           | 0.430 | 9.14     | 1.49E-04 | 0.045        |
| RIKEN cDNA 3300001P08 gene (3300001P08Rik)                                         | 3300001P08RIK | 0.423 | 9.93     | 3.48E-04 | 0.070        |
| heat shock protein 8 (Hspa8)                                                       | HSPA8         | 0.410 | 10.63    | 6.99E-05 | 0.036        |
| vesicle transport through interaction with t-SNAREs 1B homolog (Vti1b)             | VTI1B         | 0.406 | 8.02     | 6.13E-04 | 0.087        |

|                                                                                                                                                                                                  |               |       |       |          |       |
|--------------------------------------------------------------------------------------------------------------------------------------------------------------------------------------------------|---------------|-------|-------|----------|-------|
|                                                                                                                                                                                                  | D630048P19RIK | 0.396 | 8.60  | 2.67E-05 | 0.028 |
| tubulin, beta 2c (Tubb2c)                                                                                                                                                                        | TUBB2C        | 0.394 | 11.44 | 2.81E-04 | 0.063 |
| methionine adenosyltransferase II, alpha (Mat2a)                                                                                                                                                 | MAT2A         | 0.388 | 8.11  | 1.42E-04 | 0.045 |
| AHA1, activator of heat shock protein ATPase homolog 1 (yeast) (Ahsa1)                                                                                                                           | AHSA1         | 0.387 | 8.14  | 4.42E-04 | 0.078 |
| protein tyrosine phosphatase 4a2 (Ptp4a2)                                                                                                                                                        | PTP4A2        | 0.384 | 8.12  | 1.87E-04 | 0.050 |
| transportin 3 (Tnpo3)                                                                                                                                                                            | TNPO3         | 0.372 | 8.32  | 2.79E-04 | 0.063 |
| sushi-repeat-containing protein (SrpX)                                                                                                                                                           | SRPX          | 0.371 | 7.08  | 6.37E-04 | 0.087 |
| forkhead box N3 (Foxn3)                                                                                                                                                                          | FOXN3         | 0.370 | 8.81  | 3.19E-04 | 0.067 |
|                                                                                                                                                                                                  | 3000003G13RIK | 0.369 | 9.18  | 2.15E-04 | 0.055 |
| solute carrier family 25 (mitochondrial carnitine/acylcarnitine translocase), member 20 (Slc25a20)                                                                                               | SLC25A20      | 0.368 | 8.85  | 1.00E-04 | 0.039 |
| PREDICTED: predicted gene, EG433144 (EG433144)                                                                                                                                                   | EG433144      | 0.364 | 9.15  | 2.61E-04 | 0.061 |
| guanine nucleotide binding protein (G protein), beta 5 (Gnb5), transcript variant 1                                                                                                              | GNB5          | 0.354 | 8.13  | 1.24E-04 | 0.040 |
| RIKEN cDNA 2410003P15 gene (2410003P15Rik)                                                                                                                                                       | 2410003P15RIK | 0.353 | 9.32  | 1.53E-04 | 0.045 |
| aminolevulinic acid synthase 1 (Alas1)                                                                                                                                                           | ALAS1         | 0.352 | 12.39 | 3.96E-05 | 0.028 |
| LIM domain binding 3 (Ldb3), transcript variant 6                                                                                                                                                | LDB3          | 0.351 | 10.09 | 6.45E-05 | 0.036 |
| peroxisome proliferative activated receptor, gamma, coactivator 1 beta (Ppargc1b)                                                                                                                | PPARGC1B      | 0.351 | 9.58  | 7.38E-04 | 0.093 |
| leucine-rich repeats and transmembrane domains 1 (Lrtm1)                                                                                                                                         | LRTM1         | 0.349 | 9.86  | 6.77E-05 | 0.036 |
| G kinase anchoring protein 1 (Gkap1)                                                                                                                                                             | GKAP1         | 0.347 | 8.57  | 4.48E-04 | 0.079 |
| TNNI3 interacting kinase (Tnni3k)                                                                                                                                                                | TNNI3K        | 0.344 | 8.26  | 7.64E-05 | 0.036 |
| high density lipoprotein (HDL) binding protein (Hdlbp)                                                                                                                                           | HDLBP         | 0.339 | 8.37  | 2.57E-04 | 0.061 |
| heterogeneous nuclear ribonucleoprotein H1 (Hnrph1)                                                                                                                                              | HNRP1         | 0.338 | 9.43  | 6.20E-04 | 0.087 |
| desmuslin (Dmn), transcript variant 3                                                                                                                                                            | DMN           | 0.336 | 7.36  | 4.23E-04 | 0.078 |
| 3-phosphoinositide dependent protein kinase-1 (Pdpk1), transcript variant 2                                                                                                                      | PDPK1         | 0.334 | 7.99  | 3.40E-04 | 0.070 |
| BCL2-like 13 (apoptosis facilitator) (Bcl2l13), nuclear gene encoding mitochondrial protein                                                                                                      | BCL2L13       | 0.331 | 8.21  | 5.08E-04 | 0.081 |
| RIKEN cDNA 2810474O19 gene (2810474O19Rik)                                                                                                                                                       | 2810474O19RIK | 0.327 | 7.44  | 7.54E-05 | 0.036 |
| proline synthetase co-transcribed (Prosc), transcript variant 3                                                                                                                                  | PROSC         | 0.319 | 8.19  | 2.57E-04 | 0.061 |
| regulator of calcineurin 2 (Rcan2), transcript variant 1                                                                                                                                         | RCAN2         | 0.318 | 9.53  | 1.15E-04 | 0.039 |
| RIKEN cDNA B230208H17 gene (B230208H17Rik) XM_897418 XM_897429 XM_897439 XM_897452 XM_897459 XM_914394 XM_923230 XM_923233 XM_923237 XM_923239 XM_923241 XM_923243 XM_923244 XM_923249 XM_923252 | B230208H17RIK | 0.306 | 7.85  | 5.54E-04 | 0.085 |
| SNRPN upstream reading frame (Snurf)                                                                                                                                                             | SNURF         | 0.306 | 10.46 | 8.73E-04 | 0.096 |
|                                                                                                                                                                                                  | GNA13         | 0.306 | 8.17  | 8.88E-04 | 0.096 |
| SMT3 suppressor of mif two 3 homolog 3 (yeast) (Sumo3)                                                                                                                                           | SUMO3         | 0.304 | 8.33  | 4.79E-04 | 0.081 |
| insulin induced gene 2 (Insig2)                                                                                                                                                                  | INSIG2        | 0.303 | 9.52  | 1.70E-04 | 0.048 |
| zinc finger CCCH type containing 13 (Zc3h13)                                                                                                                                                     | ZC3H13        | 0.303 | 7.13  | 2.31E-04 | 0.057 |

|                                                                                               |               |       |       |          |       |
|-----------------------------------------------------------------------------------------------|---------------|-------|-------|----------|-------|
|                                                                                               | LOC331507     | 0.302 | 9.47  | 1.49E-04 | 0.045 |
| RIKEN cDNA 1700113I22 gene (1700113I22Rik)                                                    | 1700113I22RIK | 0.301 | 9.25  | 1.21E-04 | 0.040 |
| splicing factor, arginine/serine-rich 10 (transformer 2 homolog, <i>Drosophila</i> ) (Sfrs10) | SFRS10        | 0.299 | 8.01  | 9.80E-04 | 0.099 |
| EH-domain containing 4 (Ehd4)                                                                 | EHD4          | 0.293 | 12.64 | 8.95E-04 | 0.096 |
| Cd63 antigen (Cd63), transcript variant 2                                                     | CD63          | 0.289 | 8.70  | 5.64E-04 | 0.085 |
|                                                                                               | LOC384888     | 0.288 | 7.60  | 8.30E-04 | 0.096 |
| RIKEN cDNA 1110007M04 gene (1110007M04Rik)                                                    | 1110007M04RIK | 0.288 | 11.27 | 4.42E-04 | 0.078 |
| PRP19/PSO4 pre-mRNA processing factor 19 homolog ( <i>S cerevisiae</i> ) (Prpf19)             | PRPF19        | 0.288 | 8.83  | 7.08E-04 | 0.092 |
| myocyte enhancer factor 2C (Mef2c)                                                            | MEF2C         | 0.287 | 9.39  | 9.84E-04 | 0.099 |
| calumenin (Calu), transcript variant 2                                                        | CALU          | 0.286 | 7.45  | 8.81E-04 | 0.096 |
| dynein light chain LC8-type 2 (Dynll2)                                                        | DYNLL2        | 0.285 | 7.25  | 4.04E-04 | 0.076 |
| adipose differentiation related protein (Adfp)                                                | ADFP          | 0.283 | 7.71  | 6.00E-04 | 0.087 |
| transmembrane protein 49 (Tmem49)                                                             | TMEM49        | 0.278 | 8.53  | 9.87E-04 | 0.099 |
| PREDICTED: similar to medium-chain acyl-CoA dehydrogenase (LOC333331), misc RNA               | LOC333331     | 0.277 | 12.15 | 8.97E-04 | 0.096 |
| PREDICTED: similar to mitochondrial ribosomal protein S5 (LOC667609), misc RNA                | LOC667609     | 0.269 | 9.11  | 6.06E-04 | 0.087 |
| N-myc downstream regulated gene 2 (Ndrg2)                                                     | NDRG2         | 0.268 | 9.41  | 9.85E-04 | 0.099 |
| myeloid leukemia factor 2 (Mlf2)                                                              | MLF2          | 0.263 | 8.77  | 7.55E-04 | 0.095 |
| zinc finger protein 91 (Zfp91)                                                                | ZFP91         | 0.258 | 7.71  | 4.37E-04 | 0.078 |
| Shwachman-Bodian-Diamond syndrome homolog (human) (Sbds)                                      | SBDS          | 0.256 | 9.67  | 3.43E-04 | 0.070 |
|                                                                                               | C730026J16    | 0.256 | 9.02  | 4.14E-04 | 0.077 |
| H2A histone family, member Y (H2afy)                                                          | H2AFY         | 0.251 | 8.31  | 5.59E-04 | 0.085 |
|                                                                                               | SIAT7F        | 0.251 | 7.10  | 3.02E-04 | 0.065 |
| protein phosphatase 1 (formerly 2C)-like (Ppm1l)                                              | PPM1L         | 0.246 | 7.73  | 4.91E-04 | 0.081 |
| T-box 20 (Tbx20), transcript variant 1                                                        | TBX20         | 0.245 | 7.27  | 7.90E-04 | 0.096 |
| heat shock protein 3 (Hspb3)                                                                  | HSPB3         | 0.237 | 8.78  | 4.97E-04 | 0.081 |
|                                                                                               | ZFP445        | 0.235 | 7.28  | 4.77E-04 | 0.081 |
| adenylosuccinate synthetase like 1 (Adssl1)                                                   | ADSSL1        | 0.229 | 7.84  | 9.43E-04 | 0.098 |
|                                                                                               | MTF2          | 0.225 | 8.15  | 7.26E-04 | 0.093 |
| tetraspanin 3 (Tspan3)                                                                        | TSPAN3        | 0.215 | 11.15 | 8.90E-04 | 0.096 |

## (B) Downregulated genes

| DEFINITION                                                                                                   | Gene ID       | logFC  | Ave Expr | p value  | Adj. p value |
|--------------------------------------------------------------------------------------------------------------|---------------|--------|----------|----------|--------------|
| D site albumin promoter binding protein (Dbp)                                                                | DBP           | -1.203 | 10.84    | 7.01E-05 | 0.036        |
| RIKEN cDNA 1500015O10 gene (1500015O10Rik)                                                                   | 1500015O10RIK | -0.853 | 7.45     | 1.57E-05 | 0.024        |
| Indolethylamine N-methyltransferase (Inmt)                                                                   | INMT          | -0.792 | 8.87     | 4.04E-04 | 0.076        |
| PREDICTED: similar to beta chemokine Exodus-2 (LOC100041504)                                                 | LOC100041504  | -0.746 | 8.77     | 8.91E-04 | 0.096        |
| Gene model 129, (NCBI) (Gm129)                                                                               | GM129         | -0.721 | 7.32     | 5.46E-04 | 0.084        |
| Chemokine (C-C motif) ligand 21b (Ccl21b)                                                                    | CCL21B        | -0.715 | 9.60     | 1.05E-04 | 0.039        |
| Dickkopf homolog 3 (Xenopus laevis) (Dkk3)                                                                   | DKK3          | -0.695 | 7.47     | 6.56E-04 | 0.088        |
| Vesicle-associated membrane protein, associated protein B and C (Vapb)                                       | VAPB          | -0.663 | 8.22     | 3.57E-06 | 0.010        |
| Tissue inhibitor of metalloproteinase 3 (Timp3)                                                              | TIMP3         | -0.554 | 10.42    | 1.13E-04 | 0.039        |
| Angiopoietin-like 7 (Angptl7)                                                                                | ANGPTL7       | -0.536 | 7.73     | 5.86E-05 | 0.035        |
| Epoxide hydrolase 1, microsomal (Ephx1)                                                                      | EPHX1         | -0.466 | 9.59     | 5.59E-06 | 0.012        |
| Period homolog 2 (Drosophila) (Per2)                                                                         | PER2          | -0.462 | 8.34     | 2.12E-04 | 0.055        |
| Transmembrane protein 82 (Tmem82)                                                                            | TMEM82        | -0.461 | 7.94     | 3.03E-04 | 0.065        |
| Histocompatibility 2, class II antigen E beta (H2-Eb1)                                                       | H2-EB1        | -0.441 | 9.32     | 1.84E-04 | 0.050        |
| cDNA sequence X99384 (X99384)                                                                                | X99384        | -0.428 | 8.33     | 4.18E-05 | 0.028        |
| Histocompatibility 2, class II antigen A, beta 1 (H2-Ab1)                                                    | H2-AB1        | -0.420 | 9.68     | 2.76E-05 | 0.028        |
| Mid1 interacting protein 1 (gastrulation specific G12-like (zebrafish)) (Mid1ip1)                            | MID1IP1       | -0.408 | 10.00    | 5.10E-04 | 0.081        |
| Serine (or cysteine) peptidase inhibitor, clade F, member 1 (Serpinf1)                                       | SERPINF1      | -0.402 | 10.39    | 7.87E-05 | 0.036        |
| Parvalbumin (Pvalb)                                                                                          | PVALB         | -0.389 | 7.21     | 9.25E-06 | 0.016        |
| CD74 antigen (invariant polypeptide of major histocompatibility complex, class II antigen-associated) (Cd74) | CD74          | -0.384 | 9.69     | 7.90E-04 | 0.096        |
| Scavenger receptor class A, member 3 (Scara3)                                                                | SCARA3        | -0.380 | 7.57     | 1.61E-04 | 0.047        |
| PREDICTED: similar to MHC class II antigen beta chain (LOC641240)                                            | LOC641240     | -0.373 | 9.06     | 3.70E-04 | 0.072        |
| cDNA sequence BC028528 (BC028528)                                                                            | BC028528      | -0.363 | 8.85     | 9.21E-04 | 0.097        |
| Growth differentiation factor 10 (Gdf10)                                                                     | GDF10         | -0.359 | 7.50     | 3.43E-05 | 0.028        |
| 3'-Phosphoadenosine 5'-phosphosulfate synthase 2 (Papss2)                                                    | PAPSS2        | -0.355 | 8.29     | 2.19E-04 | 0.055        |
| Yippee-like 3 (Drosophila) (Ypel3)                                                                           | YPEL3         | -0.354 | 11.52    | 1.46E-04 | 0.045        |
| Midkine (Mdk), transcript variant 3                                                                          | MDK           | -0.340 | 7.59     | 1.04E-04 | 0.039        |
| Leucyl-tRNA synthetase (Lars)                                                                                | LARS          | -0.335 | 8.78     | 8.56E-05 | 0.038        |
| Cytochrome P450, family 27, subfamily a, polypeptide 1 (Cyp27a1)                                             | CYP27A1       | -0.331 | 8.75     | 6.08E-04 | 0.087        |
| Multimerin 2 (Mmrn2)                                                                                         | MMRN2         | -0.321 | 9.22     | 1.21E-04 | 0.040        |
| Insulin-like growth factor binding protein 6 (Igfbp6)                                                        | IGFBP6        | -0.304 | 7.68     | 6.99E-04 | 0.092        |
| PREDICTED: similar to HLA-G protein (LOC674135), misc RNA                                                    | LOC674135     | -0.293 | 8.70     | 4.65E-04 | 0.081        |

|                                                                                                             |               |        |       |          |       |
|-------------------------------------------------------------------------------------------------------------|---------------|--------|-------|----------|-------|
|                                                                                                             | WDFY1         | -0.293 | 7.79  | 1.12E-04 | 0.039 |
| Secreted acidic cysteine rich glycoprotein (Sparc)                                                          | SPARC         | -0.291 | 10.67 | 6.25E-04 | 0.087 |
| Aagrin (Agrn)                                                                                               | AGRN          | -0.290 | 9.64  | 2.15E-04 | 0.055 |
| PREDICTED: sterile alpha motif domain containing 9-like, transcript variant 1 (Samd9l)                      | SAMD9L        | -0.289 | 9.22  | 9.77E-04 | 0.099 |
| Bromodomain containing 2 (Brd2), transcript variant 1                                                       | BRD2          | -0.287 | 9.14  | 8.57E-04 | 0.096 |
| PREDICTED: glutaminase, transcript variant 3 (Gls)                                                          | GLS           | -0.281 | 8.25  | 6.56E-04 | 0.088 |
| Integrin, beta-like 1 (Itgb1l)                                                                              | ITGBL1        | -0.279 | 8.22  | 9.24E-04 | 0.097 |
|                                                                                                             | CCDC3         | -0.279 | 7.29  | 8.99E-04 | 0.096 |
| Transforming growth factor, beta receptor III (Tgfbr3)                                                      | TGFBR3        | -0.277 | 8.32  | 3.20E-04 | 0.067 |
| Progressive ankylosis (Ank)                                                                                 | ANK           | -0.275 | 10.20 | 5.07E-04 | 0.081 |
|                                                                                                             | 6330403M23RIK | -0.272 | 9.22  | 5.39E-04 | 0.084 |
| PREDICTED: RIKEN cDNA 1810013L24 gene (1810013L24Rik)                                                       | 1810013L24RIK | -0.270 | 8.36  | 5.13E-04 | 0.081 |
| PREDICTED: golgi autoantigen, golgin subfamily b, macrogolgin 1, transcript variant 9 (Golgb1)              | GOLGB1        | -0.268 | 8.17  | 8.04E-04 | 0.096 |
| Cadherin 5 (Cdh5)                                                                                           | CDH5          | -0.265 | 7.98  | 7.67E-04 | 0.096 |
| Matrix metalloproteinase 2 (Mmp2)                                                                           | MMP2          | -0.264 | 9.93  | 2.55E-04 | 0.061 |
|                                                                                                             | 4930533K18RIK | -0.262 | 8.22  | 6.39E-04 | 0.087 |
|                                                                                                             | 1110046J11RIK | -0.261 | 11.35 | 8.01E-04 | 0.096 |
| Ankyrin repeat domain 12 (Ankrd12)                                                                          | ANKRD12       | -0.259 | 7.71  | 5.01E-04 | 0.081 |
| ATP-binding cassette transporter sub-family A member 9 (Abca9)                                              | ABCA9         | -0.259 | 7.73  | 3.64E-04 | 0.072 |
|                                                                                                             | LOC98434      | -0.253 | 8.58  | 5.76E-04 | 0.086 |
| Lymphocyte antigen 6 complex, locus E (Ly6e)                                                                | LY6E          | -0.252 | 8.68  | 8.70E-04 | 0.096 |
|                                                                                                             | CD8B          | -0.249 | 9.21  | 9.16E-04 | 0.097 |
| SWI/SNF related, matrix associated, actin dependent regulator of chromatin, subfamily c, member 2 (Smarcc2) | SMARCC2       | -0.246 | 7.82  | 8.85E-04 | 0.096 |
| Inositol polyphosphate phosphatase-like 1 (Inpp1l)                                                          | INPPL1        | -0.240 | 10.74 | 5.88E-04 | 0.087 |
| AHNAK nucleoprotein 2 (Ahnak2)                                                                              | AHNAK2        | -0.239 | 7.73  | 6.19E-04 | 0.087 |
| 3-Hydroxybutyrate dehydrogenase, type 2 (Bdh2)                                                              | BDH2          | -0.232 | 7.23  | 7.32E-04 | 0.093 |
|                                                                                                             | PLD1          | -0.228 | 7.66  | 8.24E-04 | 0.096 |
|                                                                                                             | 1700041B20RIK | -0.218 | 8.19  | 8.77E-04 | 0.096 |

**FIGURE S1:** Time course of contractile dysfunction in response to DOX treatment

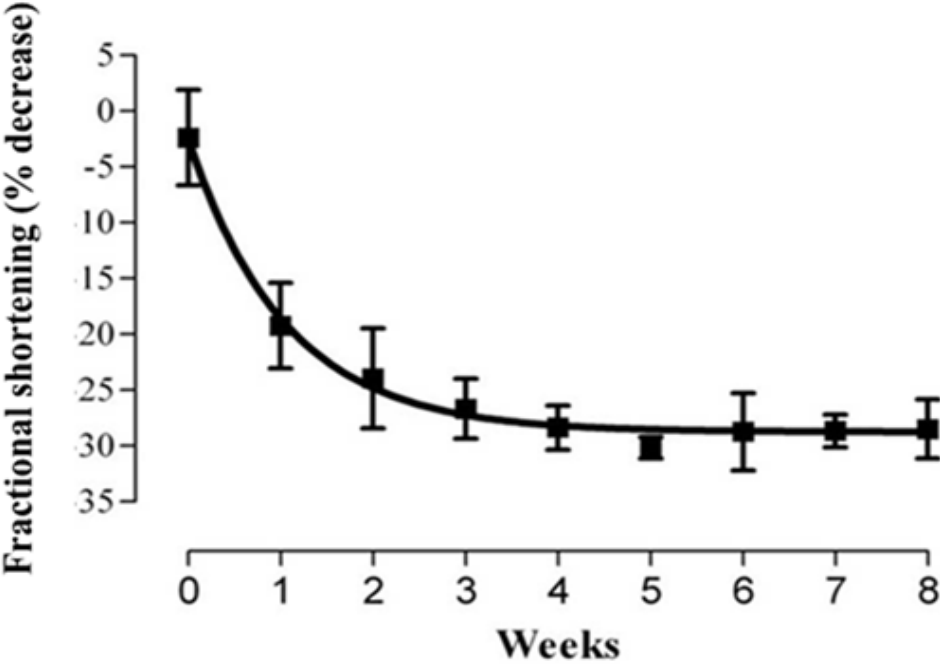

WT mice were administered saline or DOX (4mg/kg) by 3 weekly intraperitoneal (i.p.) injections and fractional shortening quantified at weekly intervals by echocardiography (n=9). Data are shown as mean±SEM and represent % decrease compared to WT control.



**FIGURE S2:** Effect of DOX on LV NOS isoenzyme and antioxidant gene mRNA expression

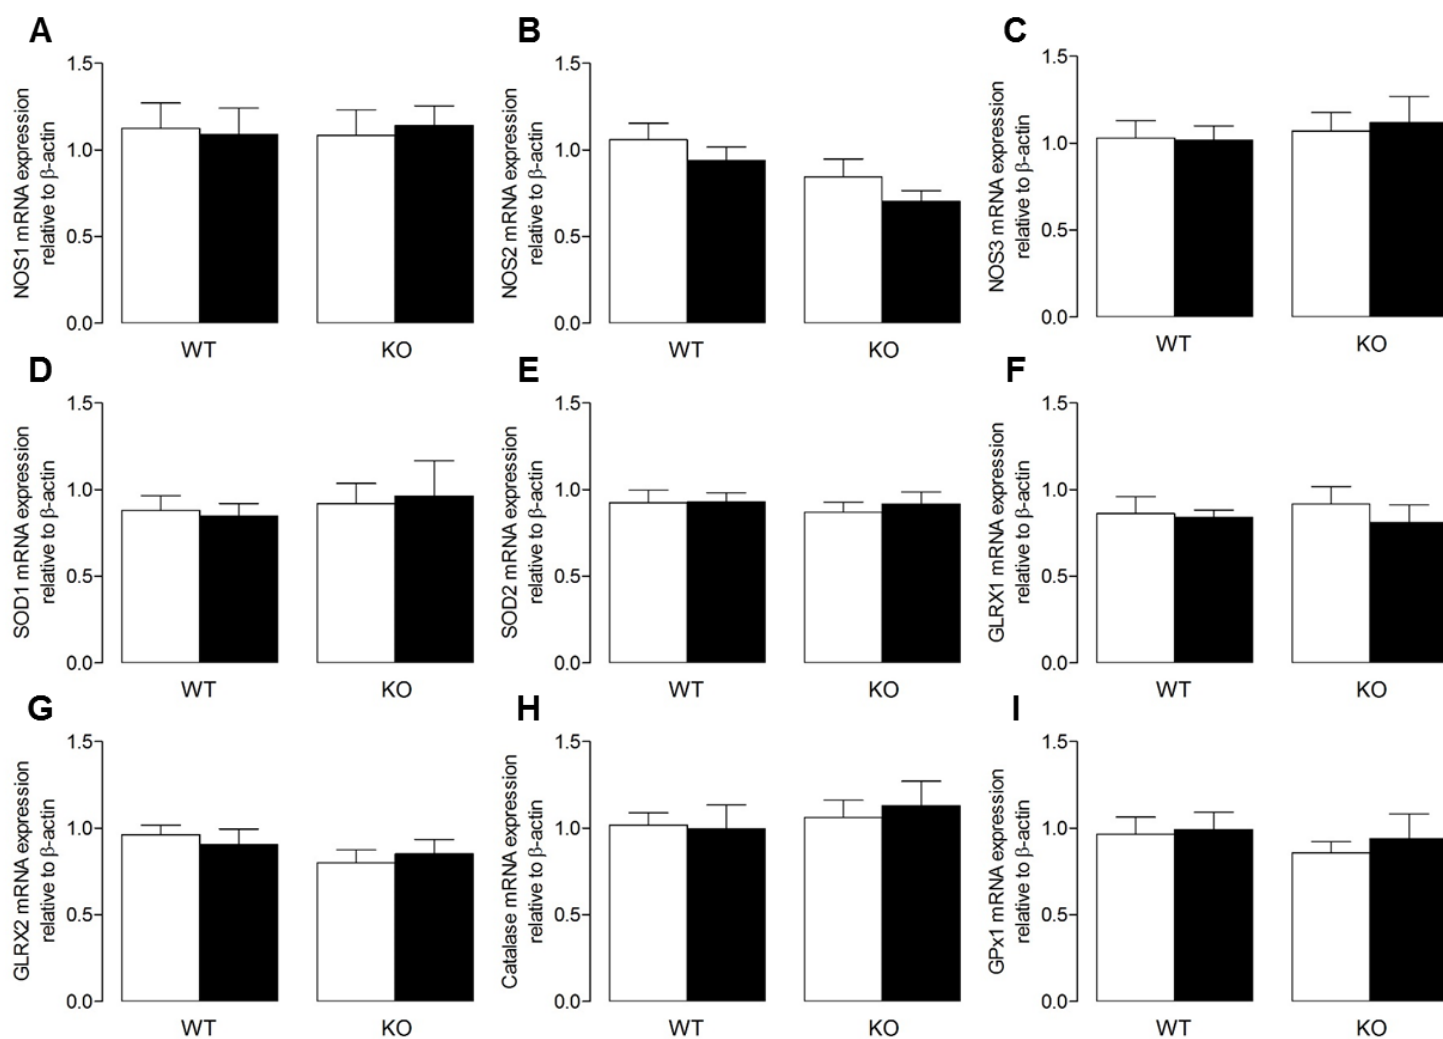

mRNA expression of (A) NOS1 (n=11-15), (B) NOS2 (n=12-13), (C) NOS3 (n=6-9), (D), superoxide dismutase 1 (SOD1, n=6-9), (E) SOD2 (n=7-9), (F), glutaredoxin 1 (GLRX1, n=6-8), (G) GLRX2 (n=11-13), (H) catalase (n=7-8), and (I) glutathione peroxidase (GPx1, n=10-13) by real-time RT-PCR. Data (Control  $\square$ , DOX  $\blacksquare$ ) are shown as mean ( $\pm$ SEM) and analyses performed using a two-factor ANOVA. P=NS.

**FIGURE S3:** Quality control assessment of Illumina MouseWG-6 v2.0 microarray

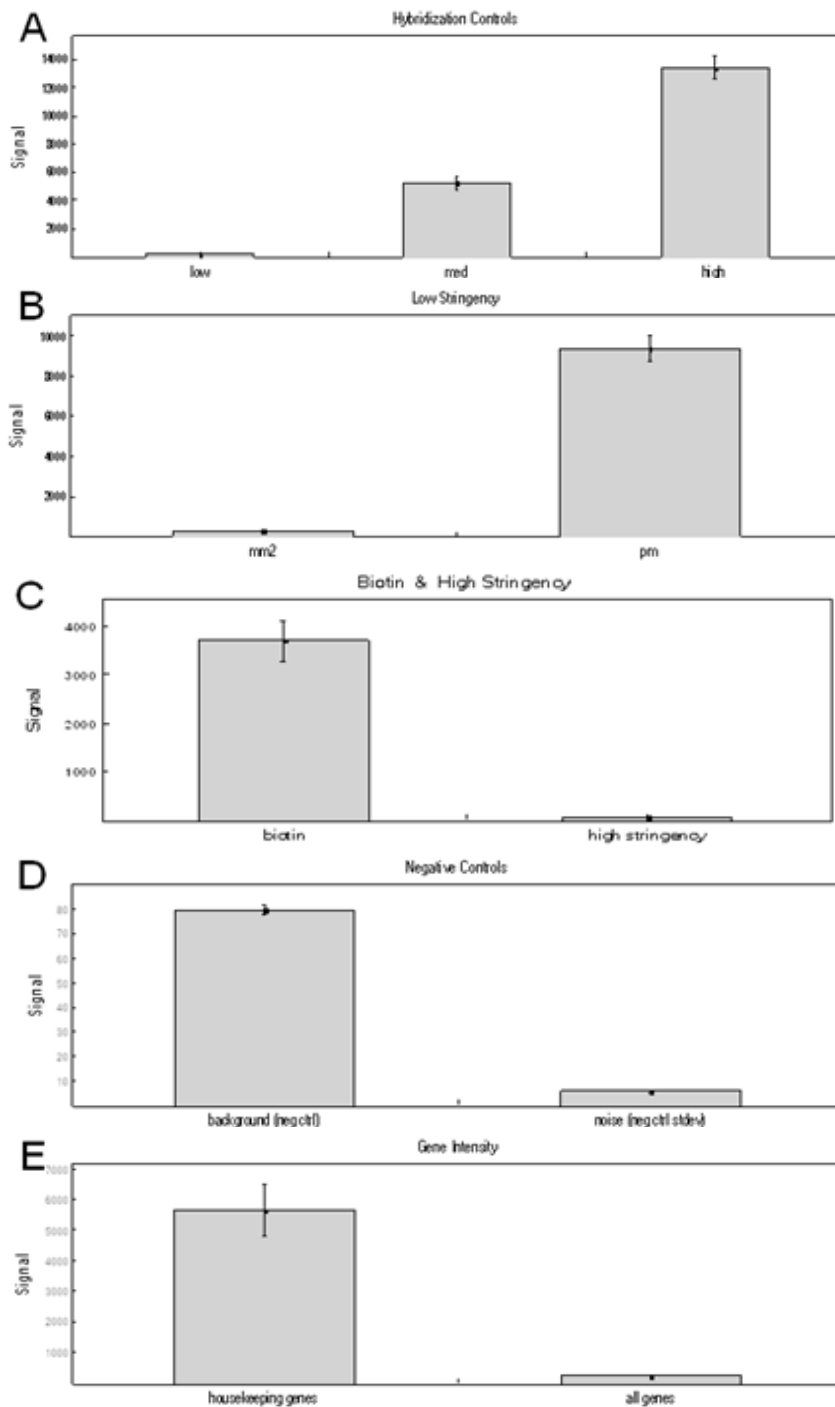

cDNA was generated from WT and *Nox2*<sup>-/-</sup> DOX-treated mouse LV (n=3) and used in evaluation of signal intensity using probes for: (A) Hybridisation; (B) Mismatch (mm2) and perfect match (pm); (C) biotin; (D) background and noise and (E) gene intensity. Signal was measured as fluorescence and expressed in arbitrary units. Bar graphs were generated by Cambridge Genomic Services.

**FIGURE S4:** Comparison of normalised transcript data within samples from WT and Nox2<sup>-/-</sup> mice.

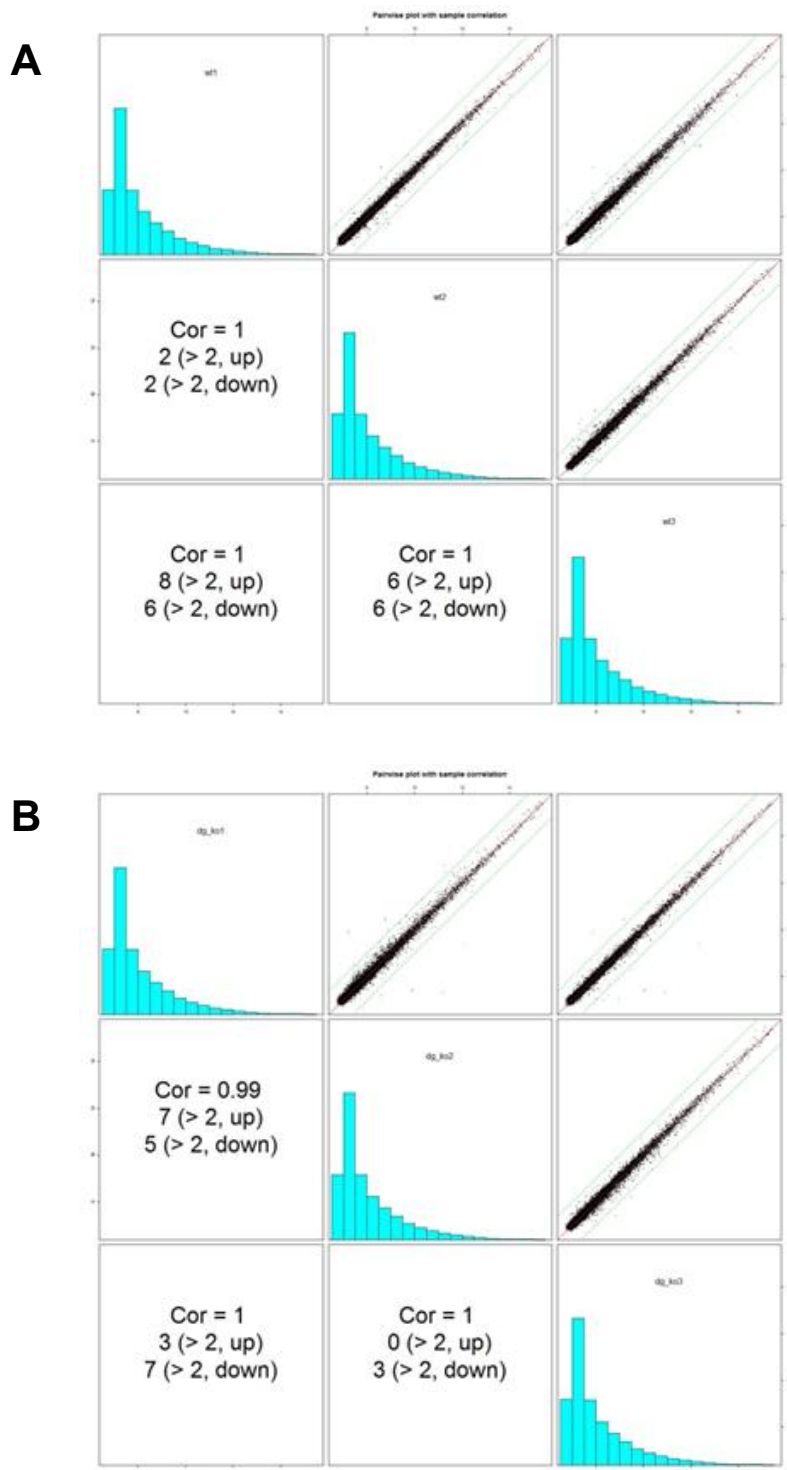

A correlation coefficient (Cor) was generated between each sample in the (A) WT group and (B) Nox2<sup>-/-</sup> group. Graphs were generated in the *R* programme using the *lumi* package by Cambridge Genomics Services.

**FIGURE S5:** Concentration responses for optimisation of experimental conditions for the ApoTox-Glo Triplex assay in HL-1 cardiomyocytes

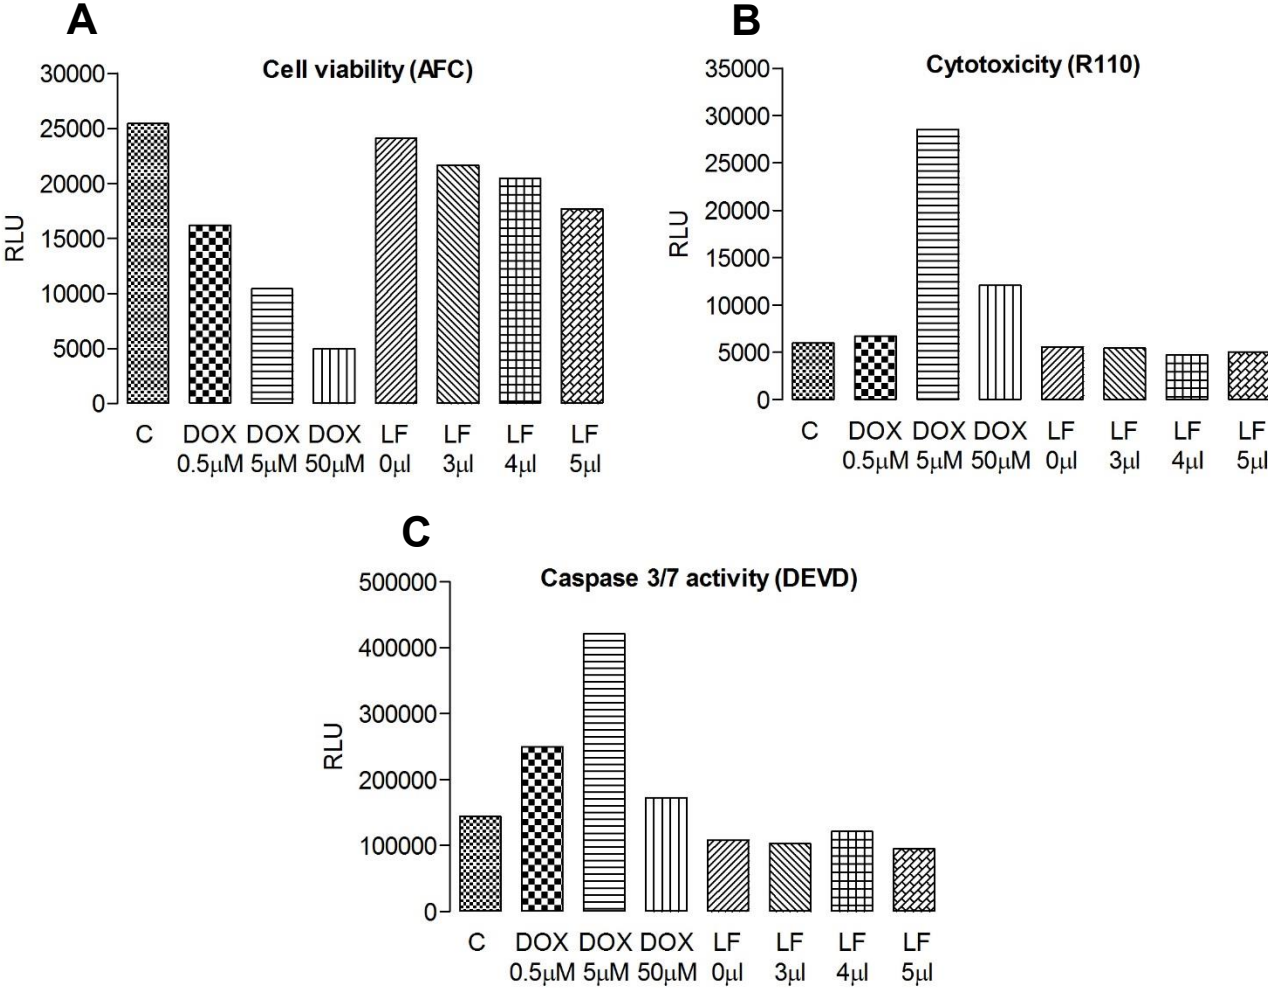

HL-1 cardiomyocytes (seeded 20000 cells/well) in a 96 well plate format were incubated in normal medium (Control, C) or with increasing concentrations of DOX (0.5µM, 5µM, 50µM), or varying volumes (0-5µl/100µl total well volume) of LF2000 (LF) for 24h prior to detection by fluorescence. (A) Cell viability (aminofluorocoumarin, AFC) and (B) cytotoxicity (rhodamine 110, R110), and by luminescence (C) Caspase 3/7 activity (cleavage of DEVD). Data are shown as average value (n=2, 8-10 replicates in each). RLU, relative light units.
